# Supplementary material for: Wearing the Future—Wearables to Empower Users to Take Greater Responsibility for Their Health and Care: Scoping Review
Source: PubMed Central journal article supplement (PMC9330198; doi:10.2196/35684), 2022-07-13
Supplement: mhealth_v10i7e35684_app4.pdf [file mhealth_v10i7e35684_app4.pdf]

| Study Characteristics                                                       | Number of studies (out of 20) |
|-----------------------------------------------------------------------------|-------------------------------|
| <b>Year</b>                                                                 |                               |
| 2015                                                                        | 1                             |
| 2016                                                                        | 2                             |
| 2017                                                                        | 1                             |
| 2018                                                                        | 3                             |
| 2019                                                                        | 5                             |
| 2020                                                                        | 7                             |
| 2021                                                                        | 1                             |
| <b>Country</b>                                                              |                               |
| UK                                                                          | 3                             |
| USA                                                                         | 12                            |
| Other European Countries (Austria, Germany, Norway, Spain, and Switzerland) | 5                             |
| <b>Study Design</b>                                                         |                               |
| Quantitative                                                                | 10                            |
| Qualitative                                                                 | 8                             |
| Mixed-Methods                                                               | 2                             |
| <b>Funding Sources Declared</b>                                             |                               |
| Yes                                                                         | 13                            |
| No                                                                          | 7                             |
